# Supplementary material
Source: Springer Nature journal article supplement (https://www.springermedizin.de/resource/supplementary/13041_2014_288_MOESM9_ESM.pdf/25657918)

**a** Development of DLFC (GSE13564)

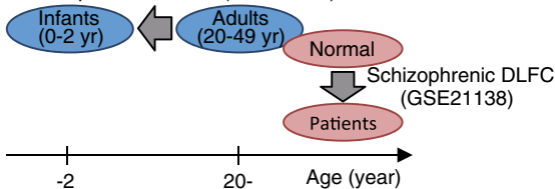

**b** Development of DLFC (GSE25219)

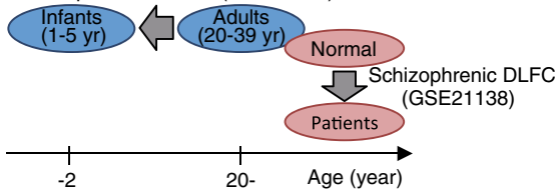

**c** Development of MFC (GSE25219)

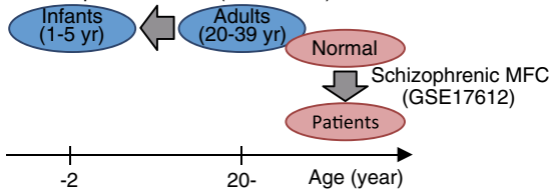

Supplement: MOESM9 [file 25657918]
